# Supplementary material for: Comprehensive analysis of lncRNA-associated competing endogenous RNA network in tongue squamous cell carcinoma
Source: PeerJ. 2019 Feb 6;7:e6397. doi: 10.7717/peerj.6397 (PMC6368841; doi:10.7717/peerj.6397)
Supplement: Table S3 [file peerj-07-6397-s003.xlsx]

## Sheet: lncRNA up-regulation
The list of lncRNAs whose expressions were up-regulated in tongue squamous cell carcinoma
gene	logFC	logCPM	PValue	FDR
AL358334.2	5.64417	8.422	5.52973e-27	3.61896e-24
HOXC-AS2	4.46165	6.66617	8.43024e-23	2.16747e-20
AC114956.2	4.14762	7.92913	1.30252e-21	2.53427e-19
LINC02081	5.57677	8.16828	9.46118e-21	1.66125e-18
AC114956.1	4.02441	6.43404	1.95711e-19	2.99771e-17
AC002384.1	6.05016	8.99762	3.46283e-18	4.37349e-16
ZFPM2-AS1	5.29799	8.9318	7.9458e-17	7.62691e-15
LINC00941	4.58787	8.93723	4.09513e-16	3.25699e-14
LINC01633	5.47475	4.85238	4.09862e-16	3.25699e-14
AL513123.1	4.39073	5.87023	6.46788e-16	4.90129e-14
GSEC	2.52662	8.65832	5.27951e-15	3.65454e-13
AC134312.5	4.37887	7.73529	3.08639e-14	2.00171e-12
FOXD2-AS1	2.35783	8.65024	4.1143e-14	2.60766e-12
HOXA10-AS	4.14953	5.65584	6.0892e-14	3.74668e-12
HOXD-AS2	3.80811	6.72764	6.30437e-14	3.8462e-12
AP003486.1	4.28697	7.35189	8.05875e-14	4.79462e-12
LINC01615	4.1957	9.59128	9.63308e-14	5.68431e-12
LINC02454	4.74683	6.96882	1.2119e-13	6.97959e-12
LINC01322	8.12735	8.70346	1.24428e-13	7.05321e-12
U62317.2	3.16842	9.98606	2.06824e-13	1.13386e-11
AC113346.1	5.66969	5.72117	4.43658e-13	2.24922e-11
AC005041.2	2.12896	5.44476	4.94998e-13	2.44075e-11
AC243773.2	5.73196	7.47057	1.08222e-12	5.09211e-11
LINC01116	3.07895	9.52451	1.09405e-12	5.11433e-11
RNF144A-AS1	3.2122	7.72883	1.70249e-12	7.70833e-11
AC090673.1	3.3982	5.97957	1.75864e-12	7.91279e-11
HOXC-AS1	4.10696	5.13195	2.06355e-12	9.17008e-11
LINC01929	6.17651	8.07767	3.17494e-12	1.35245e-10
AL365356.5	3.759	8.61655	4.3845e-12	1.80366e-10
AC109479.1	4.41883	4.88595	7.50376e-12	2.96811e-10
LINC01614	7.11745	8.15881	1.88359e-11	7.0259e-10
HS1BP3-IT1	4.46003	6.19943	2.13493e-11	7.80171e-10
AL136129.1	4.23893	5.58542	2.36444e-11	8.55357e-10
AC009093.2	2.68402	6.66135	2.71886e-11	9.78652e-10
AL136987.1	4.15623	5.47461	3.07965e-11	1.09214e-09
TTLL11-IT1	4.394	6.6622	3.55466e-11	1.24223e-09
AC011287.1	3.6353	7.05776	4.7365e-11	1.59337e-09
SLC12A5-AS1	3.33455	5.96034	5.25532e-11	1.75153e-09
AC008011.2	3.69674	7.41589	5.81254e-11	1.91071e-09
LINC01998	6.11204	6.1509	6.13431e-11	1.98923e-09
DNAH17-AS1	3.44893	6.41258	8.17367e-11	2.63867e-09
LINC01679	2.32039	9.5932	8.75651e-11	2.8142e-09
AC008147.2	2.37413	5.63578	2.03107e-10	6.16948e-09
AP003555.2	4.15685	6.91801	2.4241e-10	7.30171e-09
AC108676.1	5.71297	9.46303	3.02112e-10	8.80528e-09
AP002957.1	3.83597	4.74332	3.19087e-10	9.18843e-09
AL355916.1	2.41805	6.26549	3.54968e-10	1.01809e-08
HAGLROS	3.95733	7.23934	3.57043e-10	1.01998e-08
AC093520.1	3.45851	4.5612	4.04748e-10	1.14716e-08
AP000695.2	2.59191	7.1333	4.1658e-10	1.17147e-08
MYOSLID	2.92431	9.11848	4.41748e-10	1.23262e-08
LINC00460	4.58896	7.86855	5.08539e-10	1.392e-08
BX322234.2	7.66454	6.12755	6.34204e-10	1.7164e-08
MIR503HG	2.81016	7.93907	8.11913e-10	2.1648e-08
AC009093.1	2.98863	6.67843	9.04482e-10	2.36777e-08
AL359771.1	3.86222	6.81904	9.23541e-10	2.4089e-08
TM4SF19-AS1	2.82955	8.25369	1.00803e-09	2.61036e-08
AC010327.3	4.34688	5.87361	1.06979e-09	2.7505e-08
CYTOR	2.07787	11.0292	1.28133e-09	3.23661e-08
AC007879.3	2.47922	5.0367	1.33912e-09	3.37074e-08
LINC00943	3.17041	5.38427	1.43047e-09	3.58815e-08
LINC01179	5.07414	5.42412	1.45543e-09	3.62549e-08
LINC02434	7.33093	5.82525	1.53711e-09	3.80262e-08
AL359091.4	2.34414	6.2898	1.56896e-09	3.86814e-08
AP000695.1	2.77709	7.83798	1.86679e-09	4.54022e-08
AC012531.1	4.29383	4.57767	2.06611e-09	4.99126e-08
AL360004.1	4.2461	5.85373	2.39686e-09	5.75167e-08
AL445490.2	3.9885	4.36228	2.42967e-09	5.81102e-08
AC007611.1	2.06673	6.66859	3.11632e-09	7.2369e-08
LINC01943	2.21075	6.78776	3.48384e-09	8.06436e-08
LINC00944	2.63425	7.22746	3.60679e-09	8.3222e-08
DUXAP8	3.78803	9.00686	4.50303e-09	1.02263e-07
AC004988.1	3.76756	5.33008	4.67779e-09	1.05236e-07
AL139147.1	4.68505	5.82014	4.74046e-09	1.05983e-07
AC131157.1	3.5123	5.50064	5.92312e-09	1.29607e-07
AL135903.2	3.50892	6.49358	5.9942e-09	1.30764e-07
AC017076.1	3.22141	4.674	6.43333e-09	1.3992e-07
AC098864.1	2.67223	8.84067	6.56697e-09	1.42396e-07
AC018695.6	2.62968	6.52846	7.53903e-09	1.60572e-07
LINC00487	4.14581	3.87888	7.57869e-09	1.60941e-07
AL034399.2	2.72977	5.83377	7.62322e-09	1.6141e-07
AFAP1-AS1	6.70707	11.12	8.52057e-09	1.79356e-07
HOXA11-AS	4.85568	6.21573	8.59347e-09	1.80363e-07
LINC01426	3.25206	8.12249	9.04578e-09	1.89304e-07
AC018653.3	2.07825	7.55509	9.15265e-09	1.90985e-07
AL445490.1	3.24334	6.01329	1.06541e-08	2.18515e-07
LINC00704	3.01665	8.14664	1.54406e-08	3.08768e-07
AC012065.3	3.12583	5.87169	1.60305e-08	3.18794e-07
AC022031.2	4.78639	6.62672	1.65988e-08	3.26489e-07
MIR4713HG	2.18487	6.65069	1.71276e-08	3.35058e-07
AC107959.3	2.81774	6.7999	1.85734e-08	3.60404e-07
U62317.5	2.14086	5.56932	2.51335e-08	4.81212e-07
LINC01524	4.77946	4.9668	2.5451e-08	4.85999e-07
LINC02100	2.85902	4.99207	2.60241e-08	4.95629e-07
AL354919.2	3.64133	4.81518	2.82827e-08	5.35809e-07
HOXC13-AS	2.76632	9.13175	3.03839e-08	5.74104e-07
AC103702.2	5.67606	9.11604	3.39794e-08	6.37025e-07
PLS3-AS1	2.18343	5.74394	3.48123e-08	6.47581e-07
AL355607.2	4.08565	5.10328	3.49426e-08	6.48329e-07
AL645608.2	3.00641	4.40354	4.25829e-08	7.78057e-07
AL049775.1	2.68548	7.49889	4.27742e-08	7.78348e-07
AP005131.5	4.34614	4.83512	5.61152e-08	9.99935e-07
LINC02154	4.42595	7.76888	5.85361e-08	1.03317e-06
AL365203.1	3.53731	6.2376	6.00937e-08	1.05774e-06
LINC01561	4.59685	5.91061	6.45386e-08	1.12868e-06
AL117355.1	8.23915	6.66855	6.67529e-08	1.15796e-06
HOTAIR	2.94283	5.98759	6.85212e-08	1.18578e-06
AC005256.1	4.03135	5.19966	6.87057e-08	1.18612e-06
LINC00973	5.5227	5.24563	7.82342e-08	1.33462e-06
AC112721.2	3.79244	5.14293	8.40472e-08	1.42366e-06
LINC02156	4.15103	3.4649	8.43316e-08	1.42512e-06
INHBA-AS1	2.89663	6.10719	8.811e-08	1.48202e-06
AC034223.2	5.31952	6.58493	9.80501e-08	1.63773e-06
NKILA	2.48591	8.92509	9.95008e-08	1.65812e-06
AC100839.1	6.42048	5.03345	1.08247e-07	1.77915e-06
AC021028.1	2.2626	5.84907	1.10045e-07	1.80459e-06
AL354813.1	2.60603	4.68486	1.10719e-07	1.81151e-06
AC010595.1	5.833	5.7288	1.12826e-07	1.8418e-06
LINC02163	5.92122	4.63458	1.24179e-07	2.0089e-06
LINC01356	3.0996	6.06565	1.2577e-07	2.03008e-06
AC002076.1	3.93378	4.0047	1.26377e-07	2.03532e-06
FIRRE	2.82849	6.26916	1.53407e-07	2.44088e-06
LINC01449	4.17668	3.48237	1.53593e-07	2.44088e-06
AC108174.1	6.01422	5.36669	1.56732e-07	2.48527e-06
LINC01117	2.17141	5.90041	1.70688e-07	2.67893e-06
LINC01160	4.09153	8.20597	1.70805e-07	2.67893e-06
LINC02086	4.3909	7.09435	1.72789e-07	2.69828e-06
LINC02450	3.22928	5.59331	1.83174e-07	2.84196e-06
AC025419.1	2.64253	5.10545	2.05282e-07	3.16451e-06
AL354732.1	2.03359	6.38331	2.39008e-07	3.64538e-06
AL161431.1	3.21402	12.7136	2.64957e-07	3.97711e-06
AC010343.3	4.28106	7.60278	2.76081e-07	4.11492e-06
LINC01343	4.14984	7.57451	2.79948e-07	4.16394e-06
NRIR	2.89257	5.62274	2.87901e-07	4.27341e-06
AL390729.1	3.35587	5.6262	2.88521e-07	4.27379e-06
LINC02015	3.27324	5.85561	3.0592e-07	4.52221e-06
AC091170.1	5.61434	6.4332	3.08401e-07	4.5424e-06
AC131009.2	3.5792	4.41881	3.08547e-07	4.5424e-06
AC012213.3	2.07129	4.23415	3.25954e-07	4.77969e-06
SFTA1P	4.40562	8.23273	4.02611e-07	5.83178e-06
AC023906.5	2.01067	5.49739	4.2954e-07	6.20936e-06
Z98257.1	3.77351	6.60329	4.40387e-07	6.3534e-06
AL138789.1	4.90703	8.60214	4.46551e-07	6.42944e-06
AC119150.1	3.43385	4.57462	4.56903e-07	6.55228e-06
AC004817.3	4.03056	5.75529	4.98935e-07	7.11255e-06
AC103740.2	3.49956	4.54591	5.15232e-07	7.28715e-06
AL157702.2	2.6567	4.41306	5.47626e-07	7.69992e-06
AC112721.1	3.9517	4.29512	5.49932e-07	7.71728e-06
U62317.1	4.60746	9.16707	5.59786e-07	7.84027e-06
DLX2-AS1	3.20813	5.29558	5.64992e-07	7.89783e-06
LINC01747	3.31041	3.89665	6.09479e-07	8.38937e-06
HOXB-AS4	5.76278	5.73662	6.15977e-07	8.46263e-06
AC099487.1	3.55644	4.70931	6.25932e-07	8.5667e-06
AC020891.2	2.15846	5.81908	6.69291e-07	9.10818e-06
AL162413.1	5.65061	6.53622	6.78245e-07	9.19527e-06
Z99755.3	3.37131	7.24053	7.04879e-07	9.52049e-06
LINC00520	2.9294	8.07457	7.32559e-07	9.8024e-06
FAM87A	2.16955	6.68511	7.35023e-07	9.81712e-06
AL109924.2	3.86202	4.8509	7.8125e-07	1.03386e-05
AC093895.1	4.03159	7.35007	8.79519e-07	1.15121e-05
LINC01468	4.03585	8.00738	8.95149e-07	1.16954e-05
HAGLR	2.29357	9.33945	9.41055e-07	1.22286e-05
AL365181.3	3.27127	9.41788	9.62196e-07	1.24808e-05
STEAP3-AS1	2.17895	6.92054	9.92905e-07	1.28329e-05
LINC01050	3.44787	4.92817	1.05057e-06	1.34573e-05
CDKN2B-AS1	2.33991	7.33554	1.12016e-06	1.42474e-05
FOXC2-AS1	4.42721	4.40386	1.20339e-06	1.5279e-05
LINC02407	3.15346	6.58725	1.22118e-06	1.54503e-05
C11orf44	2.71752	4.48592	1.24482e-06	1.56943e-05
AC073130.1	3.01485	4.50853	1.25455e-06	1.57618e-05
LINC00911	3.69745	5.42873	1.28188e-06	1.60492e-05
AC087612.1	5.13264	8.15485	1.33002e-06	1.6623e-05
AP003063.1	3.44218	4.73834	1.35991e-06	1.69671e-05
AC020931.1	2.09955	4.19951	1.38756e-06	1.72523e-05
AC020907.4	2.20724	4.27381	1.47924e-06	1.83604e-05
LINC00898	3.62502	5.69142	1.51662e-06	1.87275e-05
AC016877.3	2.85319	4.94083	1.56241e-06	1.9227e-05
BBOX1-AS1	2.35807	9.50939	1.6692e-06	2.02982e-05
AC008392.1	3.66722	3.88701	1.80174e-06	2.16179e-05
AC110995.1	3.67784	8.18117	1.85711e-06	2.22082e-05
DEPDC1-AS1	2.13283	4.41084	1.90977e-06	2.27247e-05
AC025176.1	2.97606	4.14049	1.95621e-06	2.32006e-05
AC007879.2	3.16775	4.14891	2.06529e-06	2.42545e-05
AC243773.1	4.99133	3.95877	2.09877e-06	2.46076e-05
LINC02321	2.32738	5.11323	2.15781e-06	2.52177e-05
AC011893.1	3.12887	3.94708	2.21439e-06	2.57952e-05
AC109454.3	5.28956	6.02692	2.22208e-06	2.58429e-05
KCCAT198	3.9933	3.39278	2.38495e-06	2.75148e-05
AC009226.1	2.09582	5.11865	2.39987e-06	2.76168e-05
MIR2117HG	3.03972	6.93862	2.40146e-06	2.76168e-05
AL021877.2	5.28476	5.85313	2.68192e-06	3.03572e-05
AC078778.1	2.13332	5.30029	2.79071e-06	3.13912e-05
AL035446.1	3.03533	7.07174	2.99171e-06	3.3443e-05
AL596223.1	3.36717	4.9043	3.1547e-06	3.49934e-05
LINC01060	2.7068	5.66513	3.22661e-06	3.56811e-05
AC092903.2	2.32974	4.94953	3.32368e-06	3.65859e-05
AL683807.1	2.53946	5.21531	3.45788e-06	3.77613e-05
AC092119.2	2.04758	5.28192	3.74315e-06	4.05976e-05
AC055736.1	2.97497	6.83546	3.74452e-06	4.05976e-05
AL391704.1	3.46698	4.55798	4.21231e-06	4.51928e-05
AF064858.2	2.80421	4.43797	4.26683e-06	4.57097e-05
LINC00656	3.81802	4.15004	4.28698e-06	4.58573e-05
LINC01711	2.90954	6.303	4.74196e-06	4.98355e-05
LINC01338	3.52839	4.45801	4.87542e-06	5.1089e-05
AL049536.1	4.0319	3.78651	5.15762e-06	5.3501e-05
LINC01842	2.67093	6.31459	5.85032e-06	5.95707e-05
AC006372.1	4.90091	3.90468	5.92242e-06	6.02196e-05
AC009275.1	2.31404	6.79451	6.0378e-06	6.13062e-05
AC008083.1	3.04674	5.56103	6.31436e-06	6.38442e-05
AC023301.1	3.94349	4.72741	6.50651e-06	6.56027e-05
AC034223.1	4.13662	5.46656	6.86644e-06	6.88461e-05
AC079949.2	2.28051	7.2399	6.87651e-06	6.88512e-05
LINC00668	4.48074	8.92039	7.3327e-06	7.29891e-05
AC079160.1	3.56802	5.92147	7.50238e-06	7.43026e-05
C2orf48	2.07646	6.46604	7.51884e-06	7.43518e-05
AC090023.2	3.87558	3.72181	7.85613e-06	7.74744e-05
PACERR	2.69777	4.29998	8.53168e-06	8.34505e-05
CASC9	4.05343	9.91419	8.58039e-06	8.38131e-05
LINC01234	5.71233	8.19	8.94594e-06	8.69121e-05
AC024581.1	2.63867	4.35175	8.98665e-06	8.71899e-05
POT1-AS1	2.07758	6.27484	9.37343e-06	9.0698e-05
IGF2BP2-AS1	2.52156	5.46686	9.41882e-06	9.10148e-05
AC002066.1	2.35095	5.22222	9.58587e-06	9.22576e-05
GAPLINC	2.01818	5.76166	9.656e-06	9.28085e-05
AL359694.2	3.45365	3.99545	9.75097e-06	9.31148e-05
AC055854.1	2.93594	5.86452	9.84919e-06	9.36649e-05
CLEC12A-AS1	3.14578	6.22532	9.9647e-06	9.45137e-05
AL512785.1	2.93681	5.3617	1.00053e-05	9.4774e-05
LINC01391	4.34028	3.96864	1.0502e-05	9.87484e-05
AP001107.3	3.06298	3.72103	1.11116e-05	0.000103617
AL049775.3	2.56582	4.09518	1.17354e-05	0.000109011
LINC01980	5.14648	7.90618	1.25401e-05	0.000115887
MIR9-3HG	2.74543	9.57933	1.2833e-05	0.000118139
AC107959.2	2.14735	4.73672	1.2939e-05	0.000118811
AP000526.1	3.97977	4.12574	1.30611e-05	0.00011967
AC022031.1	3.81622	3.30727	1.39908e-05	0.000127494
LUARIS	2.3053	7.91421	1.41594e-05	0.000128704
PCAT7	2.18587	6.80336	1.42306e-05	0.000129025
AC083809.1	2.62578	5.04356	1.498e-05	0.00013497
AC108865.1	5.43864	5.23578	1.50311e-05	0.000135092
AC107308.1	3.47093	3.94334	1.52879e-05	0.000136887
AC026495.1	4.12576	4.84072	1.53986e-05	0.000137707
AC010735.2	2.23078	6.42342	1.58805e-05	0.000141315
LINC01776	4.75609	3.81116	1.66094e-05	0.000147255
AL096677.1	2.11039	3.48319	1.76711e-05	0.000156091
AC009121.1	2.08792	4.31724	1.79526e-05	0.000158384
AC124276.3	3.50144	3.5079	1.84345e-05	0.000162086
ANO1-AS2	2.86273	5.507	2.00266e-05	0.000173283
LINC02016	4.3608	5.44337	2.05814e-05	0.000177232
LINC01910	2.50804	5.07485	2.11197e-05	0.000181432
HOXC-AS3	3.56701	4.62001	2.15367e-05	0.000184136
AC012625.1	2.88692	3.94656	2.17783e-05	0.00018576
AC092167.1	2.52424	3.83369	2.22424e-05	0.000189271
LINC02041	3.30675	5.59493	2.23388e-05	0.000189867
HOXA-AS3	2.68838	5.5586	2.38637e-05	0.000201874
FLJ42969	2.5847	7.58272	2.44689e-05	0.000206509
AL590644.1	2.35073	6.08473	2.55177e-05	0.000214856
ELFN1-AS1	4.63349	6.52882	2.60449e-05	0.000218528
P3H2-AS1	2.94103	5.9014	2.67079e-05	0.00022331
AP001610.1	2.12017	4.88308	2.69062e-05	0.000224707
LINC00567	3.12267	4.08591	2.72193e-05	0.000227059
AC011632.1	5.99757	7.68344	2.72749e-05	0.000227259
AC105118.1	2.79451	5.13854	2.75453e-05	0.000228982
AF165147.1	2.37384	7.42243	2.8033e-05	0.000232767
AC126696.1	2.87997	3.9068	2.86322e-05	0.000236778
AC073957.1	4.37519	6.03122	2.86476e-05	0.000236778
AC008742.1	2.71703	3.98338	2.88854e-05	0.00023847
AC141930.2	3.63942	4.11761	2.96444e-05	0.000243897
AC025809.1	2.37319	3.33935	2.97382e-05	0.000244389
LINC02187	2.7343	5.86919	2.99444e-05	0.000245804
LINC01956	2.86074	4.90907	3.09924e-05	0.000253539
LINC02043	2.33941	4.44271	3.208e-05	0.000261249
AC105460.2	4.36046	5.58649	3.27108e-05	0.000265485
AC120498.8	2.60135	4.02864	3.30814e-05	0.000267888
AC239803.4	2.473	3.67166	3.33462e-05	0.00026973
LINC00922	3.11199	4.57018	3.43349e-05	0.000276484
LINC00528	2.00159	5.66727	3.45723e-05	0.000277161
AL139351.1	2.33792	4.39397	3.45729e-05	0.000277161
LINC01704	2.63634	4.76447	3.53681e-05	0.000282905
AC073578.1	3.92448	4.08491	3.60999e-05	0.000287243
AC037198.2	2.10723	5.71311	3.61487e-05	0.000287243
AC006460.1	2.13736	4.90512	3.65488e-05	0.000289774
LINC00491	2.85154	8.05849	3.68137e-05	0.00029146
AC005291.1	3.38803	4.32399	3.74469e-05	0.000294623
AF127577.3	3.33513	5.36359	3.86149e-05	0.00030315
AC133644.2	2.13798	4.67621	3.87156e-05	0.00030361
Z85994.1	2.99397	4.16698	4.11986e-05	0.000320637
AC016026.1	2.01953	4.33495	4.14743e-05	0.000322085
AC099506.1	2.75052	4.13049	4.21902e-05	0.00032694
AL355607.1	2.64801	5.95934	4.22972e-05	0.000327417
SPRY4-IT1	2.35485	3.84588	4.371e-05	0.000337627
AC005291.2	2.94905	4.71855	4.77514e-05	0.000364155
LINC00525	3.16689	4.78705	5.18197e-05	0.000391859
AL391845.2	2.30235	4.64908	5.20845e-05	0.000393036
LINC01494	3.19848	3.35306	5.31916e-05	0.000398882
AC073324.2	2.97283	4.15991	5.52594e-05	0.000413097
AC034199.1	2.03114	4.68283	5.53389e-05	0.000413262
AC002401.4	2.405	7.7069	5.56553e-05	0.000415194
AC026369.1	2.44761	4.74827	5.61321e-05	0.000417453
TRPM2-AS	2.99207	6.90037	5.75104e-05	0.000427262
AC037486.1	2.93332	3.6934	5.7856e-05	0.000428945
AL023754.1	2.18721	6.38037	5.90821e-05	0.000436238
AL356056.1	2.95243	4.08228	6.14506e-05	0.000450033
AP001505.1	4.7581	7.1475	6.17573e-05	0.000450904
AC007991.2	3.20881	3.74428	6.3313e-05	0.000459466
AP000525.1	2.77316	4.92011	6.35084e-05	0.000460263
AC008663.1	3.33144	5.93386	6.35507e-05	0.000460263
AP001790.1	2.6783	4.64862	6.37334e-05	0.000461122
AC013762.1	3.73439	3.65302	6.40164e-05	0.000462241
AC063977.6	3.57167	3.85256	6.52217e-05	0.000470472
LINC01882	3.78353	5.8284	6.62782e-05	0.00047666
LINC00052	4.8737	6.32556	6.69406e-05	0.000480464
AC005993.1	3.16011	5.85588	6.9116e-05	0.000494975
AC090125.1	4.16458	3.9097	7.03227e-05	0.000501442
AP001471.1	2.46549	3.70881	7.07982e-05	0.000503136
TSPEAR-AS1	3.02434	5.75301	7.12417e-05	0.000505788
LINC01191	2.10726	4.32359	7.33073e-05	0.000518408
FLJ12825	2.33152	5.24706	7.36725e-05	0.000520479
AC100801.1	3.64529	8.12623	7.4022e-05	0.000522435
AL663074.1	2.94896	3.2461	7.42981e-05	0.000523871
AF274856.1	4.32282	3.94082	7.64163e-05	0.000537227
AL590666.2	2.44963	7.00958	7.7002e-05	0.000540817
AC007879.4	2.39787	3.37202	8.04235e-05	0.000561016
AC116049.2	4.08288	4.18721	8.22789e-05	0.000571192
AL356414.1	3.52681	3.18292	8.68083e-05	0.000598845
LINC01204	3.14391	3.96226	8.68446e-05	0.000598845
LINC01181	3.96848	4.33262	8.79568e-05	0.000604776
AC022613.1	2.1954	6.33327	8.99968e-05	0.000617035
AP004247.2	3.73995	3.59939	9.33245e-05	0.000635613
AC239799.2	2.67688	4.49939	9.39326e-05	0.00063915
LINC01583	3.38362	4.73185	9.43095e-05	0.000641109
LINC00705	2.50295	4.1641	9.51488e-05	0.000645595
AC105460.1	4.46969	10.3737	9.67195e-05	0.000655018
PICSAR	2.61503	9.66992	0.000101282	0.00068463
LINC01807	5.31134	5.79093	0.000102446	0.000691848
AC092070.4	2.84772	3.2016	0.000104786	0.000706321
AC100778.2	2.10681	3.73187	0.000107092	0.000715837
AP005482.1	2.605	6.37504	0.000107261	0.000716297
AL590438.1	2.08882	4.30796	0.000107491	0.00071651
AL157871.2	2.22513	5.29014	0.00010785	0.000718234
AL365181.2	3.16571	6.84998	0.000107961	0.000718309
LINC01802	2.89134	3.22418	0.000112154	0.000740053
AC110285.6	2.23149	4.35221	0.000119168	0.000780611
AC089983.1	3.04599	4.40983	0.000124	0.000807124
AP001046.1	2.07883	4.46061	0.000135644	0.000869544
LINC00313	2.12103	3.8117	0.000138947	0.000887556
AC022915.3	3.30668	3.40013	0.00014166	0.000904086
AC044798.2	4.14623	3.4623	0.000143892	0.000916707
LINC01254	3.37448	4.6063	0.000146349	0.000931041
VCAN-AS1	3.55152	3.19346	0.000148766	0.000943428
LINC00862	2.41197	4.68138	0.000149317	0.000944579
AC069257.1	2.25708	3.57095	0.000157182	0.000984818
AL355303.1	2.98128	5.73607	0.000159259	0.000995756
AC025569.1	2.40529	7.01433	0.000167526	0.00103788
AC015909.1	3.0136	3.25442	0.000168175	0.00104101
AC020891.3	2.06747	3.56167	0.000170159	0.00105058
RRM1-AS1	2.72421	3.13256	0.000171319	0.00105631
KC877982.1	5.81258	7.69346	0.000172786	0.00106315
LINC00601	2.82855	4.61196	0.000173901	0.0010691
AC093801.1	2.31691	3.73831	0.000177921	0.00109195
AC156455.1	2.56161	6.29655	0.00017954	0.00109907
AC078860.1	3.05963	3.54918	0.000180396	0.00110282
LINC01518	3.69917	5.66705	0.000180458	0.00110282
AC011595.3	3.10766	3.55445	0.000182065	0.00111007
KCNQ5-IT1	2.59842	3.46056	0.000182107	0.00111007
AC018716.2	2.20133	5.74494	0.000183158	0.00111553
CASC20	4.72621	5.22323	0.000187361	0.00113728
AC122710.3	2.63284	4.3509	0.000188857	0.00114443
LINC01925	4.38266	3.58536	0.000195493	0.00117869
AF274855.1	5.88915	5.7774	0.000198324	0.00119476
AC023824.4	6.17649	4.83586	0.000201953	0.00121357
LINC01450	2.95798	3.24818	0.000203554	0.0012195
AC007991.4	2.83305	3.81389	0.000204276	0.0012219
AC097451.1	4.71812	4.27086	0.000204358	0.0012219
AC048337.1	2.63357	3.29078	0.000220713	0.00130775
AL034550.1	2.15202	3.80492	0.000222846	0.0013193
AF230666.2	2.8718	3.21238	0.000226243	0.00133502
AC044798.1	3.6154	3.2182	0.000229725	0.00135445
AL772337.3	3.8045	3.29999	0.000231397	0.00136216
AC078788.1	2.22813	4.07869	0.000231411	0.00136216
LINC00534	4.21648	3.51644	0.000234133	0.00137481
ADGRD1-AS1	5.14142	7.0808	0.000253575	0.00146687
MAFA-AS1	2.42392	5.31743	0.000253682	0.00146687
AP002989.1	3.00575	3.26505	0.000256435	0.00147727
SNAP25-AS1	2.74687	5.07013	0.000256506	0.00147727
AC026310.2	3.28587	4.26961	0.0002578	0.00148353
IGFL2-AS1	2.33512	10.0812	0.000259539	0.00148878
AC068473.3	2.0156	7.08716	0.00027058	0.00154107
LINC01305	3.41102	6.62741	0.000272091	0.00154722
AC015660.3	3.64839	4.0579	0.000284874	0.00161227
AP001995.2	2.3035	3.33647	0.000287775	0.00162613
LINC01096	2.01584	4.97024	0.000293715	0.0016558
LINC02466	4.64238	4.24705	0.000294129	0.00165683
NAALADL2-AS2	4.46751	5.00503	0.000295694	0.00166175
AC010894.3	3.43181	6.2151	0.000316905	0.00176715
LINC01385	3.66053	3.55821	0.000327822	0.00182238
LINC00452	3.21115	4.50028	0.000330232	0.00183295
MIR2052HG	2.78302	5.36455	0.000331986	0.00184127
AC008687.2	2.08721	3.71723	0.000345204	0.00189994
AP001099.1	3.22709	4.39053	0.000358532	0.0019613
LINC01460	2.37065	5.16171	0.000367112	0.00200064
AP000904.1	5.22994	5.77824	0.000375523	0.00204492
AL356277.3	4.10347	3.44747	0.000376449	0.00204842
LINC00896	2.20001	4.85718	0.000380291	0.0020662
AC105206.1	2.63081	3.11437	0.000383174	0.00207873
AL357992.1	2.18232	3.86981	0.00039086	0.00211564
AL356417.2	2.17675	4.73869	0.000417857	0.00224322
AC008708.1	3.82327	4.00092	0.000422522	0.00226319
AC008278.1	3.5647	3.83202	0.000428172	0.00228666
TBX18-AS1	2.52697	4.05646	0.000429447	0.00229007
AC125608.1	4.68481	6.88802	0.000434099	0.00230803
AC010735.1	2.54265	4.41302	0.000439375	0.00233264
AC087442.1	2.58527	3.28856	0.00044346	0.00235049
LINC01429	2.84249	3.90685	0.000450939	0.00238174
AC087667.1	3.30131	4.88713	0.00045222	0.002385
LINC01033	3.53567	4.3972	0.000459697	0.00242089
AL365356.3	2.57619	8.17854	0.000460726	0.00242452
AP001178.2	2.05515	3.20871	0.00046106	0.00242452
AC080129.1	3.30317	3.65152	0.000471703	0.00247506
AC010275.1	3.85581	5.75727	0.000480429	0.00251902
AL512488.1	2.20791	7.26072	0.000486297	0.00254053
TSPEAR-AS2	2.65479	6.24541	0.000522881	0.00270362
AC124276.1	3.78638	3.69759	0.000538995	0.00276961
LINC01592	3.70017	4.15504	0.000540752	0.00277666
C2-AS1	2.63575	4.22417	0.000550879	0.0028221
AL163952.1	2.49149	4.90253	0.000551406	0.0028221
AC006372.2	3.8265	3.31457	0.000551819	0.0028221
AL138962.1	2.90545	3.64785	0.000555747	0.00283744
LINC01647	3.22961	3.58682	0.00056893	0.00289042
LINC00518	2.07557	6.01212	0.000572197	0.00290292
AL162632.1	2.19811	3.73107	0.000580635	0.00293952
AC090337.1	2.6744	3.12311	0.000584233	0.00295363
LINC01833	3.7859	5.49187	0.00062445	0.00312399
AP002852.2	2.1291	4.4431	0.000628387	0.00313932
AP002784.1	2.31744	5.26536	0.000647759	0.00322045
AC108865.2	4.32071	4.27863	0.000652092	0.00323529
AC015849.1	2.33641	3.4946	0.00071137	0.00348378
LINC02475	4.63363	4.56661	0.000741441	0.00361628
AC122694.1	3.11788	3.89815	0.000752441	0.00366497
AC022079.1	2.00198	4.62134	0.000753809	0.00366662
LINC02428	2.90804	5.97364	0.000754309	0.00366662
AC093843.1	2.78359	3.17202	0.000761193	0.00369262
LINC00839	2.24657	9.34558	0.000762226	0.00369513
AC012213.1	2.0122	5.0691	0.000773043	0.00373249
AC016735.1	2.61962	3.87239	0.000802305	0.00386082
AC020913.3	2.02231	3.19382	0.000804217	0.00386228
AC019068.1	2.68687	3.95156	0.000807362	0.00387208
LINC01293	2.24217	5.89773	0.000807933	0.00387208
AC007952.2	2.49683	3.42651	0.000808097	0.00387208
AL031283.3	2.74576	4.50096	0.000812844	0.00388557
AC018716.1	2.47442	4.96208	0.000822431	0.00392488
AC078788.2	3.04798	3.51867	0.000829971	0.00394908
AC012363.1	4.82607	3.86729	0.000836031	0.00397115
RAPGEF4-AS1	2.05345	3.43241	0.000850081	0.00402879
ATP6V1B1-AS1	2.67406	3.6379	0.000857465	0.00406111
AL355340.1	2.61764	3.11259	0.00089476	0.00422385
AC126773.1	2.39988	4.5907	0.000898069	0.00423543
PSORS1C3	2.22325	5.54538	0.00091027	0.00428303
LINC01194	6.03087	4.7333	0.000926576	0.00435122
ERVH48-1	3.54598	7.52777	0.00095893	0.00447687
AC117402.1	2.59902	6.3395	0.000967201	0.00450469
COL5A1-AS1	2.76255	3.1782	0.000967989	0.00450469
AL354811.1	2.30735	3.82083	0.000970058	0.00451127
AC012213.4	2.35921	4.8952	0.000984504	0.00456665
AC003092.1	2.68627	3.83887	0.000998515	0.00462271
LINC02158	2.49778	5.68993	0.00101151	0.00467985
COL4A2-AS2	3.30763	3.4221	0.00102035	0.00470877
AP002478.1	2.84897	4.46074	0.00106023	0.00486464
LINC00942	2.12178	7.61963	0.0010814	0.0049523
CDKN2A-AS1	2.7733	4.55993	0.00109493	0.00500152
C20orf197	2.23301	7.60484	0.00111195	0.00506963
LINC00392	5.37299	6.11102	0.00122184	0.00550097
LINC01555	2.80044	3.39384	0.0012372	0.00555969
AC009093.4	2.30661	3.8085	0.00125882	0.00564276
AC105243.1	5.19928	9.22696	0.00126445	0.00566447
AL138885.3	3.15532	3.34454	0.00127606	0.00570768
AC084346.1	2.2185	3.94484	0.00129154	0.00575713
AC091564.7	2.2502	3.7371	0.00131049	0.00582718
LINC01419	4.89087	4.38001	0.0013444	0.00595222
POU6F2-AS2	3.92004	4.94781	0.00135884	0.00600879
AC025244.1	2.6669	4.17271	0.00136767	0.00604048
LINC02167	3.52864	5.09113	0.00136937	0.00604048
AC004704.1	4.8275	5.03671	0.00138408	0.0060942
AC009262.1	2.24548	3.82183	0.00140044	0.00614369
AP001065.1	3.49139	5.87325	0.00141519	0.00618886
AP003469.1	2.56909	3.09698	0.00141762	0.00619261
AC078906.1	2.32811	3.4868	0.00146169	0.00635813
AC022126.1	2.17255	4.20916	0.00148856	0.00646328
LINC02251	2.59137	3.29908	0.00149987	0.00650848
AL160408.5	2.21747	3.72337	0.00150239	0.00651318
AC046158.2	2.14383	3.38782	0.00151551	0.00656223
AC108515.1	4.65682	3.7278	0.00152029	0.00657725
AP001547.1	3.28177	3.40401	0.00152956	0.00660545
AF015262.1	2.61394	4.39755	0.00155868	0.00671914
LINC00355	4.29917	5.43467	0.00157857	0.00679264
AL035696.1	3.57567	3.20145	0.00159896	0.0068558
MIR548XHG	5.52272	4.32855	0.00161211	0.00689986
AC122136.1	3.68201	3.25168	0.00162254	0.00692804
AP001476.1	2.57671	4.73794	0.00167597	0.00713078
AL122019.1	2.35201	3.33508	0.00172875	0.00730784
AC026785.3	2.71034	3.96414	0.00174767	0.00737918
AC026782.2	2.65807	3.11046	0.00175373	0.0074004
AC122134.1	4.11829	3.44954	0.00176476	0.0074339
AP005209.1	3.2406	3.8183	0.00181873	0.00762552
AP000424.1	2.0067	3.88688	0.00182782	0.00765474
LINC02133	2.17283	3.13046	0.00183003	0.00765951
AC092620.1	2.03163	3.33005	0.00198252	0.00819298
LINC00514	2.15224	4.92681	0.00200586	0.00827991
AL139023.1	4.68612	3.7916	0.00215237	0.00877588
AC004241.4	2.06008	3.3709	0.00219535	0.008929
AL160408.4	2.0167	4.09567	0.00222311	0.00901135
AP000221.1	2.64697	4.68945	0.00228359	0.00919953
AC091808.1	2.35723	3.21571	0.00231291	0.00929683
AL161733.1	3.37461	3.12983	0.00239887	0.0095888
AC124254.1	3.24898	4.05175	0.00240534	0.00960404
AL162457.2	2.5006	4.56791	0.00246514	0.00979273
AC116021.1	2.05399	3.80275	0.00252112	0.00995587

## Sheet: lncRNA down-regulation
The list of lncRNAs whose expressions were down-regulated in tongue squamous cell carcinoma
gene	logFC	logCPM	PValue	FDR
LINC01829	-7.04522	6.78996	2.38458e-68	1.71666e-64
LINC01482	-4.48465	5.1568	7.58233e-44	2.72926e-40
AC027130.1	-5.92123	4.49017	1.75727e-37	4.21686e-34
AL357093.2	-6.04947	6.01223	1.11663e-34	2.00965e-31
RMST	-5.07642	3.85959	9.1327e-31	1.31493e-27
AC005056.1	-3.95676	5.74922	1.22922e-30	1.47486e-27
SRGAP3-AS2	-7.19099	6.02577	8.2012e-29	8.43435e-26
AC105094.1	-7.06207	3.79366	2.56166e-28	2.30517e-25
ZNF710-AS1	-2.52825	9.86633	1.10808e-27	8.86343e-25
AC018618.1	-5.05898	3.19012	2.18702e-27	1.57444e-24
AL359715.2	-2.83321	5.72611	1.26526e-26	7.59051e-24
AC104574.2	-4.75361	3.423	4.89938e-26	2.71312e-23
LINC02160	-6.00884	4.05994	8.30375e-26	4.2699e-23
LINC01798	-3.42505	4.28767	1.13735e-25	5.45852e-23
AL161668.3	-3.86074	4.71024	5.07246e-25	2.28229e-22
AC091563.1	-3.09878	8.04163	1.78418e-24	7.55549e-22
LINC00443	-4.35682	3.2926	4.5197e-24	1.80763e-21
AC013264.1	-4.60051	4.79409	5.10141e-24	1.9329e-21
FOXCUT	-3.79498	5.67956	6.83863e-24	2.46156e-21
LINC02343	-5.62648	3.47803	7.67938e-24	2.63256e-21
ALDH1L1-AS2	-4.38363	5.01545	1.35498e-23	4.43387e-21
AL161618.1	-5.9549	3.80307	1.53247e-23	4.79663e-21
AL137246.2	-6.40931	7.11653	2.08759e-23	6.2619e-21
LINC01405	-4.156	8.6263	2.28865e-23	6.5904e-21
MUC19	-5.65255	6.50674	3.2984e-23	9.13277e-21
AL451062.1	-4.01866	5.58336	5.8905e-23	1.57058e-20
AL353747.3	-6.14535	3.38073	9.65046e-23	2.39564e-20
AC005165.1	-4.41742	6.8816	1.29316e-22	3.10315e-20
CEBPB-AS1	-2.04691	6.27875	3.53911e-22	8.21872e-20
AC004832.1	-5.53985	4.69001	5.13654e-22	1.15556e-19
LINC01797	-5.81032	3.39852	7.1753e-22	1.5653e-19
IDI2-AS1	-3.11947	5.37996	7.96328e-22	1.68611e-19
AC126696.2	-3.45204	3.95675	8.82543e-22	1.81527e-19
LINC00844	-4.35372	3.67272	1.15716e-21	2.314e-19
MIR133A1HG	-4.76723	9.10974	2.41899e-21	4.52822e-19
AC010425.1	-5.09685	3.46537	2.45313e-21	4.52822e-19
AC147651.1	-3.94454	3.98844	2.56336e-21	4.61341e-19
AC116345.1	-3.43848	5.03102	1.07243e-20	1.83819e-18
AC005393.1	-3.15875	5.87889	4.38947e-20	7.34878e-18
AL357153.1	-3.03251	5.22135	8.65624e-20	1.41628e-17
WDR86-AS1	-3.22045	6.25845	1.29426e-19	2.07054e-17
LINC01765	-4.75776	3.89861	1.7364e-19	2.71747e-17
TTLL10-AS1	-3.66672	4.49172	2.24795e-19	3.37145e-17
SOX9-AS1	-2.43896	6.94132	6.73697e-19	9.89785e-17
AC138474.1	-4.08683	3.57504	8.47143e-19	1.21972e-16
ACBD3-AS1	-2.52948	6.41003	1.0622e-18	1.49936e-16
AC138356.1	-2.34477	4.72705	1.16162e-18	1.60817e-16
AC125611.4	-3.22895	4.87274	1.45945e-18	1.98237e-16
LINC01908	-4.9505	3.12303	2.39247e-18	3.18952e-16
IL12A-AS1	-2.7914	5.17473	2.91705e-18	3.81815e-16
AC092802.1	-2.84428	4.31917	3.298e-18	4.2397e-16
UG0898H09	-4.04455	5.39045	3.69078e-18	4.51351e-16
SALRNA1	-2.77508	5.16595	3.69908e-18	4.51351e-16
LINC00330	-3.99246	5.68259	5.44395e-18	6.53184e-16
AC023300.2	-5.65449	4.43422	7.4829e-18	8.83105e-16
LINC01894	-3.40274	3.859	9.37919e-18	1.08905e-15
LINC00327	-2.3078	5.72127	1.05213e-17	1.18356e-15
AQP4-AS1	-4.15401	4.46958	1.0522e-17	1.18356e-15
HCG22	-4.2746	9.16191	1.85155e-17	2.04376e-15
AC124067.4	-3.7393	3.65247	1.87371e-17	2.04376e-15
AC005532.1	-2.82692	5.52054	2.0465e-17	2.18692e-15
LINC01395	-3.06028	5.92499	2.06571e-17	2.18692e-15
AC024592.2	-3.16669	5.7594	3.35768e-17	3.50318e-15
LINC01554	-2.98447	6.28554	4.03699e-17	4.15175e-15
AL356123.2	-3.51908	5.6074	5.93655e-17	6.01932e-15
AC005083.1	-2.41205	7.50881	6.09109e-17	6.09025e-15
AP003500.1	-3.56059	5.33356	6.48468e-17	6.39496e-15
PART1	-3.07379	9.0669	7.35723e-17	7.1574e-15
Z97653.1	-2.71399	4.52882	8.88325e-17	8.41454e-15
AC103563.7	-3.54758	4.86474	9.64972e-17	9.02186e-15
DNMBP-AS1	-2.61234	4.75837	1.07413e-16	9.91366e-15
AC002401.3	-3.04167	3.75065	1.40488e-16	1.28022e-14
AC002401.2	-3.59379	3.48728	1.52131e-16	1.36899e-14
AC123912.4	-3.12672	3.8536	2.53853e-16	2.25616e-14
AC002546.1	-2.15044	7.80782	2.67786e-16	2.35097e-14
SLC8A1-AS1	-3.13195	5.48506	3.35367e-16	2.86985e-14
AC002546.2	-4.23625	3.49465	3.38849e-16	2.86985e-14
AP001528.2	-2.45203	5.68592	3.57534e-16	2.99289e-14
LINC01091	-2.3793	6.82202	3.85665e-16	3.19127e-14
HHATL-AS1	-3.75049	3.36909	4.09169e-16	3.25699e-14
AC127070.3	-2.70223	5.17996	4.11705e-16	3.25699e-14
TTC39A-AS1	-2.80018	4.25898	4.7965e-16	3.74455e-14
AC009041.2	-2.52526	7.75081	4.83739e-16	3.74455e-14
AP000438.1	-3.71466	3.30983	8.34559e-16	6.25833e-14
AC027281.1	-5.58588	3.45454	1.33443e-15	9.90364e-14
AP005717.1	-2.51593	3.87531	1.36392e-15	1.00193e-13
HSD52	-3.52512	3.86301	1.72086e-15	1.25136e-13
MYHAS	-3.15886	8.11884	1.76289e-15	1.26911e-13
SMC2-AS1	-2.60044	4.89066	1.82848e-15	1.30329e-13
AC005225.2	-2.86115	3.90275	4.1852e-15	2.95385e-13
AC069224.1	-2.16138	5.94303	5.0069e-15	3.49948e-13
DRAIC	-2.60383	4.95375	6.05888e-15	4.15408e-13
LINC02471	-4.26729	4.21126	7.1204e-15	4.83583e-13
UMODL1-AS1	-3.9616	4.84398	1.90734e-14	1.28326e-12
AC018529.1	-2.66169	4.14528	1.96007e-14	1.29811e-12
WFDC21P	-2.5641	12.4669	2.37575e-14	1.55482e-12
AC087672.2	-3.86156	4.78869	3.19191e-14	2.05166e-12
AL136366.1	-3.00126	4.00049	4.12937e-14	2.60766e-12
LINC01954	-3.22816	3.39064	5.55225e-14	3.44575e-12
AL132855.1	-3.97516	3.57967	7.63536e-14	4.61907e-12
AC002451.1	-2.68727	3.513	7.97511e-14	4.7844e-12
AL133370.1	-3.44728	3.44762	1.12065e-13	6.55901e-12
AL133410.3	-2.50778	6.16089	1.20945e-13	6.97959e-12
AC005920.1	-3.28577	3.33364	1.37382e-13	7.72669e-12
AC010624.1	-2.50405	4.18543	1.71351e-13	9.56245e-12
AC107067.1	-2.35075	4.54762	1.96385e-13	1.08752e-11
AC104564.2	-2.74741	4.03905	2.07904e-13	1.13386e-11
LINC02463	-3.65734	3.43862	2.12152e-13	1.13976e-11
AC100803.1	-2.95051	5.66621	2.37384e-13	1.26213e-11
AC096637.2	-3.24325	4.12063	2.38436e-13	1.26213e-11
C5orf66-AS1	-2.84592	9.16187	3.10169e-13	1.61805e-11
AL356270.1	-2.90123	3.95418	3.1966e-13	1.65556e-11
LINC00492	-3.07492	4.05081	3.35069e-13	1.72297e-11
AL079303.2	-2.75729	7.46287	4.50552e-13	2.2682e-11
AC104211.1	-2.84689	3.23972	4.6719e-13	2.33562e-11
TLX1NB	-3.06476	4.30484	4.86042e-13	2.41312e-11
LINC01600	-2.22656	4.23878	5.35369e-13	2.62185e-11
C8orf34-AS1	-3.67617	4.92023	5.90441e-13	2.87202e-11
AC092892.1	-4.63504	4.08906	6.67323e-13	3.2242e-11
AL645924.1	-4.18049	3.29358	7.2194e-13	3.45695e-11
AL356123.1	-3.74984	9.5875	7.25099e-13	3.45695e-11
AC068700.1	-2.91473	7.42489	9.4635e-13	4.48209e-11
AL080248.1	-4.54339	3.21644	1.33205e-12	6.14706e-11
LINC01513	-4.17814	3.34675	1.59641e-12	7.32011e-11
LINC01913	-4.1962	3.36761	1.6093e-12	7.33248e-11
AC113349.1	-5.24761	3.12672	1.92059e-12	8.58779e-11
AC002398.2	-3.36911	5.3235	2.33572e-12	1.0253e-10
LINC01489	-3.7406	3.59843	2.51319e-12	1.09651e-10
AC006441.4	-2.71046	3.44841	2.54344e-12	1.10302e-10
MIR99AHG	-2.0144	8.08804	2.6027e-12	1.12197e-10
AC005323.1	-3.08665	4.94691	3.12479e-12	1.33901e-10
AL022068.1	-2.42649	5.35309	3.23384e-12	1.36774e-10
C10orf71-AS1	-3.69993	6.25342	3.28216e-12	1.37374e-10
AC011352.3	-3.03442	5.40471	3.4783e-12	1.44742e-10
AC061975.7	-2.11877	6.79348	3.60179e-12	1.49019e-10
LINC00551	-2.76491	3.57761	4.61944e-12	1.88951e-10
AC015878.1	-3.7826	6.90604	5.34632e-12	2.17447e-10
LINC01634	-2.99075	5.73162	5.63913e-12	2.28068e-10
LINC01269	-2.34642	7.48609	6.21289e-12	2.49869e-10
AC097468.1	-3.93969	3.20815	6.95594e-12	2.78199e-10
AC025154.2	-4.24029	5.46946	7.44267e-12	2.96021e-10
AL133320.1	-4.12807	3.40088	8.64031e-12	3.39279e-10
FALEC	-2.44511	5.59438	8.67167e-12	3.39279e-10
AC007920.1	-3.9175	3.54041	1.02337e-11	3.98231e-10
AC004231.1	-2.26135	4.75685	1.11463e-11	4.29102e-10
AL121899.1	-2.20701	6.60099	1.40164e-11	5.36723e-10
AC097173.2	-3.18985	4.07221	1.43467e-11	5.46464e-10
AC079061.1	-3.21905	3.22056	2.0607e-11	7.58534e-10
AC121158.1	-2.97444	3.87954	3.00306e-11	1.07557e-09
RBPMS-AS1	-2.04113	5.59289	3.06561e-11	1.09214e-09
AC027348.1	-2.47116	3.57323	3.27345e-11	1.15518e-09
AL606468.1	-2.47343	4.1087	3.362e-11	1.18064e-09
AC013275.1	-3.42915	3.94812	3.88798e-11	1.35215e-09
AP000785.2	-2.10236	5.17586	4.23652e-11	1.45927e-09
AL035701.1	-3.24723	4.2335	4.49188e-11	1.52533e-09
LINC01697	-3.22246	6.71532	4.52324e-11	1.52877e-09
AC022568.1	-3.62821	3.85009	5.00886e-11	1.67715e-09
AL138760.1	-2.43689	3.89067	5.43265e-11	1.80229e-09
LINC01983	-2.94367	3.98945	5.48334e-11	1.81076e-09
PANCR	-3.4482	4.92757	5.91198e-11	1.92581e-09
AC069431.1	-2.58578	4.48867	1.09279e-10	3.45043e-09
AC113133.1	-3.68087	4.08793	1.16649e-10	3.66707e-09
AC007938.4	-2.14704	4.0657	1.33812e-10	4.15222e-09
LINC01778	-2.41474	3.13587	1.52524e-10	4.71255e-09
AC121764.1	-3.8553	3.52344	1.99522e-10	6.08625e-09
LINC01950	-3.24043	3.37822	2.44532e-10	7.33495e-09
AC124947.1	-2.24076	4.04239	2.4827e-10	7.41617e-09
AC015908.2	-2.5909	3.29543	2.51272e-10	7.47483e-09
FLG-AS1	-2.16844	7.99663	2.87319e-10	8.51198e-09
DSG1-AS1	-2.44838	8.34484	2.89275e-10	8.53479e-09
AC005162.2	-2.46906	4.57046	2.9813e-10	8.72951e-09
LINC02095	-3.38037	3.75555	3.09577e-10	8.95037e-09
LINC00472	-2.08677	5.34208	4.92672e-10	1.35372e-08
AL135999.3	-3.25226	3.16801	5.91866e-10	1.60787e-08
AC026765.2	-2.71269	3.32855	7.98925e-10	2.13809e-08
AC021087.4	-2.85986	6.5848	1.02895e-09	2.65497e-08
LINC02224	-3.23509	3.22601	1.12796e-09	2.88974e-08
MIR1-1HG	-3.28375	8.38851	1.17639e-09	3.00313e-08
LINC01266	-2.40933	3.60654	1.19184e-09	3.03183e-08
LINC01886	-2.84405	5.55982	1.25576e-09	3.18316e-08
AC109309.1	-2.8675	3.14153	1.44354e-09	3.60835e-08
LINC01625	-2.29212	3.49981	1.47345e-09	3.65772e-08
SLCO4A1-AS1	-2.42346	7.22133	1.61733e-09	3.97118e-08
AC237221.1	-3.05551	4.58831	1.62179e-09	3.97118e-08
AC025539.1	-2.51049	4.65351	1.64499e-09	4.01433e-08
AC018697.1	-2.79781	3.48347	1.94352e-09	4.71091e-08
AL592424.1	-2.49614	7.14845	2.44788e-09	5.83519e-08
AC073842.1	-2.16545	3.28009	2.61954e-09	6.18298e-08
AL021328.1	-2.50965	6.00114	2.85682e-09	6.6991e-08
AC012555.1	-2.20015	3.45693	3.02525e-09	7.07104e-08
AC087525.1	-2.69237	6.10949	3.11425e-09	7.2369e-08
LINC02243	-2.2038	3.20882	3.80029e-09	8.74068e-08
AC106869.1	-2.01957	3.68166	3.85878e-09	8.84692e-08
DLGAP1-AS5	-4.0411	7.30702	4.3219e-09	9.87725e-08
AC084026.2	-2.45982	3.2128	4.35315e-09	9.9172e-08
AC046168.2	-2.69325	3.29904	4.58181e-09	1.034e-07
AC093159.1	-2.83269	6.09955	4.70795e-09	1.05584e-07
LANCL1-AS1	-2.22961	7.20182	4.78796e-09	1.06714e-07
AL445423.1	-2.12487	3.71866	5.12137e-09	1.13792e-07
AL132642.1	-2.06824	3.9438	5.55681e-09	1.2271e-07
ZFY-AS1	-3.00122	4.5899	5.83929e-09	1.28162e-07
MGC32805	-2.39884	4.69675	6.67755e-09	1.44359e-07
LINC02265	-2.2032	3.91838	6.72738e-09	1.44759e-07
LINC01497	-3.5918	4.79553	6.73624e-09	1.44759e-07
AC118754.2	-2.25985	3.44814	7.68795e-09	1.62304e-07
AC130456.3	-2.65226	3.43439	9.19824e-09	1.91382e-07
AL355312.3	-2.03503	7.62533	1.0005e-08	2.07567e-07
AC118754.1	-2.23227	4.07912	1.00354e-08	2.07599e-07
SLC26A4-AS1	-2.73651	5.45603	1.07277e-08	2.194e-07
LINC01978	-2.04474	4.14819	1.17497e-08	2.3962e-07
AC020637.1	-2.82571	4.92472	1.24035e-08	2.5153e-07
PGM5-AS1	-2.50809	3.52493	1.24576e-08	2.51916e-07
AC010329.1	-3.00542	4.67659	1.41998e-08	2.85543e-07
LINC02036	-2.08975	4.64503	1.63206e-08	3.2278e-07
AC139749.1	-2.72463	4.43193	1.65519e-08	3.26457e-07
AC005699.1	-2.23289	3.64012	1.68858e-08	3.31229e-07
AC129507.4	-2.708	3.52444	2.1531e-08	4.15554e-07
AC024597.1	-2.41309	5.501	3.10401e-08	5.84968e-07
AL121820.2	-2.31132	4.58814	3.43935e-08	6.41448e-07
LINC00689	-2.32645	4.68566	4.16698e-08	7.63311e-07
STPG2-AS1	-3.41651	3.22083	4.28151e-08	7.78348e-07
AC092769.1	-2.42132	3.63054	4.43612e-08	8.02402e-07
LINC01166	-2.74606	3.21642	5.14291e-08	9.23286e-07
AC011352.1	-2.70322	4.47193	5.16198e-08	9.24405e-07
AC073389.2	-2.53718	3.29646	5.70168e-08	1.011e-06
AL137793.1	-2.55892	3.82459	5.85546e-08	1.03317e-06
LINC01372	-2.07169	7.40422	6.36591e-08	1.11776e-06
AC116021.2	-3.41722	3.33664	6.45944e-08	1.12868e-06
AC111149.2	-4.03179	4.91627	6.52786e-08	1.13787e-06
LINC01889	-4.42756	3.87082	6.5533e-08	1.13955e-06
AC006333.1	-2.74793	3.81143	7.15445e-08	1.22923e-06
LINC02188	-2.04137	8.33991	7.27989e-08	1.24781e-06
AC005616.1	-3.33676	3.86398	8.38296e-08	1.42332e-06
ATP13A5-AS1	-2.43293	3.37031	1.04293e-07	1.72821e-06
AC012354.1	-2.92785	3.16601	1.61481e-07	2.55495e-06
AC124312.2	-2.03258	3.90671	1.77271e-07	2.76228e-06
MEIS1-AS3	-2.16226	3.42701	1.78849e-07	2.78086e-06
AC005392.2	-2.22716	8.5901	1.90078e-07	2.94274e-06
AC124312.4	-2.29222	3.33934	1.94299e-07	3.00163e-06
AC010547.2	-3.17749	3.28903	2.06988e-07	3.18399e-06
LINC02147	-2.06205	3.44697	2.28334e-07	3.49739e-06
AP000439.2	-2.36206	4.38944	2.51066e-07	3.81314e-06
GLIS2-AS1	-2.00542	4.19734	2.54318e-07	3.85438e-06
AC025271.4	-2.28427	3.60841	2.63178e-07	3.97194e-06
AC004947.1	-2.31571	4.27906	2.65177e-07	3.97711e-06
MNX1-AS2	-2.65443	3.13759	3.33301e-07	4.8769e-06
Z97205.1	-2.32362	3.40339	3.54531e-07	5.17702e-06
FAM3D-AS1	-2.11548	3.22197	4.56495e-07	6.55228e-06
PCAT18	-3.43067	3.8842	5.96372e-07	8.25631e-06
AL136140.1	-3.04631	3.33606	6.0944e-07	8.38937e-06
AC104667.2	-2.02406	5.09526	6.3839e-07	8.70411e-06
AL161908.1	-2.53177	5.01292	7.11678e-07	9.5925e-06
CRAT37	-2.49949	3.14971	7.12875e-07	9.5925e-06
AC002463.1	-3.1393	3.56803	7.95884e-07	1.0513e-05
AC006262.3	-2.54331	3.47223	9.31893e-07	1.21315e-05
AP000808.1	-2.33099	7.18132	1.11954e-06	1.42474e-05
AC020656.2	-2.24967	3.51122	1.37835e-06	1.71674e-05
AL445426.1	-2.0051	3.38245	1.50786e-06	1.86514e-05
AC113410.2	-3.04168	4.48156	1.76465e-06	2.12437e-05
AL354754.1	-2.58142	4.37928	1.79016e-06	2.15148e-05
AF186192.1	-2.02956	3.77787	2.59391e-06	2.96405e-05
AC099521.2	-2.29756	3.37301	2.60941e-06	2.97495e-05
AC133794.1	-3.04265	3.7546	2.67577e-06	3.03352e-05
LINC01996	-2.46932	4.83646	2.83412e-06	3.18297e-05
PAQR9-AS1	-2.42075	3.1408	3.08441e-06	3.43194e-05
ADARB2-AS1	-2.49678	4.73807	3.12063e-06	3.46689e-05
DIO2-AS1	-2.26639	4.08734	3.7344e-06	4.05976e-05
AC002351.1	-2.45803	4.29796	4.16327e-06	4.47335e-05
LINC00970	-2.37687	3.19088	4.42479e-06	4.69132e-05
AC127029.2	-2.84874	4.96023	4.53246e-06	4.79136e-05
AC103563.2	-2.79456	5.33806	4.67341e-06	4.91869e-05
AC090241.2	-2.4162	3.72248	5.22629e-06	5.39843e-05
AC098798.1	-2.60911	3.68048	5.3405e-06	5.50018e-05
LINC01854	-3.26299	5.81125	5.55035e-06	5.68378e-05
AC105105.2	-2.28484	3.14398	6.53651e-06	6.58131e-05
AC090403.1	-2.44004	3.42546	7.31326e-06	7.29273e-05
AL451069.1	-2.28084	3.33067	8.45959e-06	8.29708e-05
AL358473.2	-2.2077	4.54074	9.67012e-06	9.28203e-05
LINC01344	-2.20922	3.41418	1.03581e-05	9.76023e-05
AC116565.1	-2.57475	3.36191	1.09377e-05	0.00010226
AC015712.4	-2.8293	3.32578	1.24908e-05	0.00011558
MEOX2-AS1	-2.0962	4.21203	1.43754e-05	0.00013012
AC129492.2	-2.55265	3.12491	1.61285e-05	0.000143345
AC007207.2	-2.3287	3.29792	2.04275e-05	0.000176523
GLIS3-AS1	-2.06724	3.61147	2.73397e-05	0.000227536
AP001999.1	-2.00749	3.65698	3.61385e-05	0.000287243
LHFPL3-AS1	-2.95845	4.31568	3.61498e-05	0.000287243
LINC01187	-2.51854	3.14647	4.55125e-05	0.000349301
AL360268.1	-2.61288	3.28076	5.20126e-05	0.000392905
LINC01014	-2.87631	3.0969	6.09964e-05	0.000447618
AC003985.2	-3.18446	4.34687	7.21298e-05	0.000511588
LINC00992	-2.27498	5.40642	7.74854e-05	0.000543682
LINC00261	-2.50964	4.61179	8.32365e-05	0.000576727
AL355482.1	-2.23334	3.30869	0.00011034	0.000730761
DPP10-AS1	-2.80344	3.20384	0.000114217	0.000752973
AC243829.2	-2.18157	4.62382	0.000123516	0.0008047
AC062015.1	-2.19136	4.1524	0.000130597	0.000842447
LINC02303	-2.72835	3.66116	0.000132193	0.000849696
SSTR5-AS1	-2.02004	7.32801	0.000153756	0.000965872
CLDN10-AS1	-2.42424	4.03829	0.000162844	0.00101411
LINC01726	-2.46528	4.53521	0.000171381	0.00105631
AL355596.1	-2.00245	5.46703	0.000194534	0.00117389
AL499627.1	-2.01499	7.55001	0.000208728	0.00124597
TUSC8	-2.85873	5.27937	0.000270998	0.00154222
LINC02279	-2.21227	3.92243	0.000302762	0.00169486
AC133485.2	-2.27983	4.70199	0.000343859	0.00189544
AC110491.1	-2.1628	3.07047	0.00038952	0.00210997
AC130456.2	-2.30012	3.69869	0.000481596	0.00252146
LINC02331	-2.48903	3.26477	0.000669518	0.0033058
LINC01475	-2.06314	5.36977	0.00139296	0.0061183
AC068057.1	-2.04369	3.38468	0.00168959	0.00717601
