# Supplementary material for: Comprehensive analysis of lncRNA-associated competing endogenous RNA network in tongue squamous cell carcinoma
Source: PeerJ. 2019 Feb 6;7:e6397. doi: 10.7717/peerj.6397 (PMC6368841; doi:10.7717/peerj.6397)
Supplement: Table S4 [file peerj-07-6397-s004.xlsx]

## Sheet: miRNA up-regulation
The list of miRNAs whose expressions were up-regulated in tongue squamous cell carcinoma
gene	logFC	logCPM	PValue	FDR
hsa-mir-615	5.6715	1.40835	4.42993e-18	1.39986e-16
hsa-mir-455	2.50258	8.78147	5.09787e-16	1.15066e-14
hsa-mir-196b	4.30021	6.96093	1.50925e-14	2.89043e-13
hsa-mir-503	3.12364	3.69696	5.2412e-13	8.49344e-12
hsa-mir-196a-2	4.80523	4.99812	7.65962e-13	1.21022e-11
hsa-mir-196a-1	4.73785	4.8466	8.31655e-12	1.14262e-10
hsa-mir-224	2.04058	7.11158	3.72463e-10	3.98977e-09
hsa-mir-1910	4.08707	0.673296	1.57233e-09	1.60276e-08
hsa-mir-877	2.21096	1.59517	3.27575e-09	3.18503e-08
hsa-mir-450a-1	2.12869	2.4867	4.16305e-09	3.86919e-08
hsa-mir-301a	2.09424	3.71545	2.64305e-08	2.25731e-07
hsa-mir-4652	4.70239	1.62034	3.75093e-08	3.1192e-07
hsa-mir-210	2.34801	10.0324	1.68862e-07	1.28579e-06
hsa-mir-31	2.73721	7.42971	1.743e-07	1.3114e-06
hsa-mir-7705	2.06929	0.640189	1.78763e-07	1.32916e-06
hsa-mir-1293	3.13882	4.43573	2.69141e-07	1.93292e-06
hsa-mir-1305	3.0233	0.482672	5.7892e-07	3.73344e-06
hsa-mir-937	2.45225	2.12222	8.15121e-07	5.15156e-06
hsa-mir-7854	2.31176	-0.0478082	1.18754e-06	7.28663e-06
hsa-mir-3940	2.0053	0.828039	3.23105e-06	1.89076e-05
hsa-mir-301b	2.11079	0.891446	4.87892e-06	2.77791e-05
hsa-mir-4713	2.7588	-0.365141	5.89465e-06	3.32627e-05
hsa-mir-4745	3.65259	-0.551565	7.27873e-06	4.03523e-05
hsa-mir-4658	3.84714	-0.472312	8.45979e-06	4.60136e-05
hsa-mir-548f-1	4.29912	0.0668831	4.50619e-05	0.000210956
hsa-mir-7-3	2.03485	0.718069	5.22658e-05	0.000239362
hsa-mir-7-2	2.02336	0.808915	6.15448e-05	0.000273918
hsa-mir-3662	2.21324	0.736019	7.62958e-05	0.000332544
hsa-mir-1269a	4.85703	6.47153	0.000139749	0.000568671
hsa-mir-573	2.41211	-0.286402	0.000184736	0.000694958
hsa-mir-767	4.64399	4.87596	0.000249463	0.000911332
hsa-mir-105-2	4.9945	4.46758	0.000265895	0.000965778
hsa-mir-105-1	4.94735	4.46214	0.000279391	0.00100044
hsa-mir-4724	2.29233	-0.443541	0.000280188	0.00100044
hsa-mir-519a-1	2.37679	0.970738	0.000436208	0.00147424
hsa-mir-4788	2.05968	0.108135	0.000570815	0.00188877
hsa-mir-6891	2.20411	-0.0589453	0.000816406	0.0025543
hsa-mir-9-1	2.1615	9.19527	0.00113711	0.00342217
hsa-mir-9-2	2.13292	9.19593	0.00131727	0.00383114
hsa-mir-9-3	2.12038	9.19617	0.0013898	0.00399252
hsa-mir-6728	2.26251	-0.398076	0.00186084	0.00511325
hsa-mir-548k	2.52739	-0.304445	0.00268755	0.00713668

## Sheet: miRNA down-regulation
The list of miRNAs whose expressions were down-regulated in tongue squamous cell carcinoma
gene	logFC	logCPM	PValue	FDR
hsa-mir-135a-2	-5.29393	0.360219	6.11312e-37	3.86349e-34
hsa-mir-299	-3.12355	4.03312	2.88288e-36	9.1099e-34
hsa-mir-381	-3.77384	8.06944	9.87539e-35	2.08041e-32
hsa-mir-135a-1	-4.58465	-0.0225385	1.64473e-30	2.59867e-28
hsa-mir-885	-4.46896	1.80335	2.38302e-27	3.01213e-25
hsa-mir-30a	-2.20983	13.7172	3.59447e-25	3.78617e-23
hsa-mir-378c	-2.63705	4.1788	1.26438e-24	1.14156e-22
hsa-mir-101-2	-2.04145	12.356	2.20675e-23	1.73213e-21
hsa-mir-411	-2.86659	4.56031	2.57897e-23	1.73213e-21
hsa-mir-101-1	-2.03725	12.3427	2.74072e-23	1.73213e-21
hsa-mir-376c	-2.40482	3.59231	2.25724e-21	1.18881e-19
hsa-mir-34c	-2.73196	5.68772	2.01882e-20	9.81455e-19
hsa-mir-378a	-2.37715	10.9428	3.72579e-20	1.68193e-18
hsa-mir-486-1	-2.45652	7.28275	4.06074e-19	1.71093e-17
hsa-mir-486-2	-2.44394	7.26768	4.59603e-19	1.81543e-17
hsa-mir-495	-2.24464	3.4497	1.27926e-18	4.75584e-17
hsa-mir-375	-3.88758	11.7181	1.96601e-18	6.90287e-17
hsa-mir-29c	-2.18184	11.2158	4.18859e-18	1.39326e-16
hsa-mir-378d-2	-2.72332	0.47182	1.79866e-17	5.41312e-16
hsa-mir-99a	-2.32451	8.95326	5.21022e-17	1.49675e-15
hsa-mir-136	-2.00645	5.57503	6.16983e-17	1.69536e-15
hsa-mir-379	-2.12257	10.6806	1.00431e-16	2.53889e-15
hsa-mir-1258	-2.62316	0.210263	1.87982e-16	4.56941e-15
hsa-let-7c	-2.14113	11.0927	2.20692e-16	5.16582e-15
hsa-mir-337	-2.17919	5.17364	6.78635e-16	1.47896e-14
hsa-mir-410	-2.3538	4.59728	9.22052e-16	1.94246e-14
hsa-mir-378d-1	-2.78202	0.234613	3.18663e-15	6.49662e-14
hsa-mir-34b	-2.50917	3.04751	6.98e-15	1.37855e-13
hsa-mir-449a	-4.7656	1.51285	1.98251e-13	3.29722e-12
hsa-mir-499a	-3.09147	2.24055	1.51096e-12	2.27363e-11
hsa-mir-208b	-2.86487	2.127	8.68444e-11	9.80101e-10
hsa-mir-1-1	-2.71225	9.37839	3.04353e-09	3.05319e-08
hsa-mir-1-2	-2.6962	9.4721	4.47681e-09	4.1005e-08
hsa-mir-449b	-4.19594	-0.457496	5.43763e-08	4.46309e-07
hsa-mir-133a-1	-2.32388	9.20016	3.91633e-07	2.72933e-06
hsa-mir-133a-2	-2.34938	9.02017	4.43593e-07	2.98245e-06
hsa-mir-208a	-2.22163	-0.493425	4.80806e-07	3.19863e-06
hsa-mir-133b	-2.07363	7.75041	6.94075e-06	3.88191e-05
hsa-mir-211	-2.64737	0.198717	0.000729458	0.00230509
